# Supplementary material for: Giovanni Santi’s Late 15th-Century Paintings: Microscopic, Spectroscopic and Chromatographic Investigations on Pigments, Powdered Glass and Binding Media
Source: MDPI journal article supplement (doi:10.3390/app13179739), 2023-08-28
Supplement: s1 [file s1]

Archive with 2 entries (2 files):
- Supplementary figures 16 08.pdf
- Supplementary tables 16 08.pdf
