# Supplementary material for: Giovanni Santi’s Late 15th-Century Paintings: Microscopic, Spectroscopic and Chromatographic Investigations on Pigments, Powdered Glass and Binding Media
Source: MDPI journal article supplement (doi:10.3390/app13179739), 2023-08-28
Supplement: s1 [file s1]

**Table S1.** Description of the micro-samples and the integrated analyses

|                 | Painting title, date* and location                                                       | Sample code | Sampling area                                         | Colour and typology    | Investigations                        |
|-----------------|------------------------------------------------------------------------------------------|-------------|-------------------------------------------------------|------------------------|---------------------------------------|
| Giovanni Santi  | <i>Martyrdom of Saint Sebastian</i> , c.1487–1488; Urbino, Casa Raffaello                | GSM1        | Trousers of the first crossbowman, right leg          | Red, highlighting      | PLM, ESEM-EDX, FTIR, Raman, FTIR-ATR  |
|                 |                                                                                          | GSM2        | Trousers of the second archer, left leg               | Pink, highlighting     | PLM, ESEM-EDX, FTIR, FTIR-ATR         |
|                 |                                                                                          | GSM3        | Left sleeve of the first archer                       | Green, highlighting    | PLM, ESEM-EDX, FTIR, FTIR-ATR         |
|                 |                                                                                          | GSM4        | Trees behind St. Sebastian                            | Green                  | PLM, ESEM-EDX, FTIR, Raman, FTIR-ATR  |
|                 |                                                                                          | GSM5        | Mountains, landscape, left of the tree                | Light blue             | PLM, ESEM-EDX, FTIR, FTIR-ATR         |
|                 |                                                                                          | GSM6        | Blood drop, St. Sebastian's right leg                 | Red                    | PLM, ESEM-EDX, FTIR, FTIR-ATR         |
|                 |                                                                                          | GSM7        | St. Sebastian's loincloth                             | Violet-blue            | PLM, ESEM-EDX, FTIR                   |
|                 |                                                                                          | GSM8        | St. Sebastian's right calf                            | Reddish brown, shading | PLM, ESEM-EDX, FTIR                   |
|                 |                                                                                          | GSM9        | Back of the wood panel                                | Wood                   | PLM; ESEM                             |
|                 |                                                                                          | GSM10       | Sky, upper right side                                 | Pale blue              | PLM, ESEM-EDX, FTIR, FTIR-ATR         |
|                 |                                                                                          | GSM11       | Rocks under St. Sebastian's feet                      | Brown, shading         | PLM, ESEM-EDX, FTIR                   |
|                 |                                                                                          | GSM12       | Leg of the archer                                     | Yellow repainting      | GC-MS                                 |
|                 |                                                                                          | GSM13       | Trousers of the first crossbowman, left leg           | Red repainting         | GC-MS                                 |
|                 | <i>Visitation</i> , c.1488-1490; Fano, Santa Maria Nuova Church                          | SF1         | Flesh tone of maid, back of St. Elisabeth, left wrist | Pinkish white          | PLM, ESEM-EDX, Raman, FTIR-ATR, GC-MS |
|                 |                                                                                          | SF2         | First woman on the left, mantle                       | Green, shading         | PLM, ESEM-EDX, FTIR-ATR, GC-MS        |
|                 |                                                                                          | SF3         | Virgin's dress                                        | Pale red               | PLM, ESEM-EDX, FTIR-ATR               |
|                 |                                                                                          | SF4         | St. Elisabeth's mantle                                | Lake red, shading      | PLM, ESEM-EDX, FTIR-ATR, GC-MS        |
|                 |                                                                                          | SF5         | St Joseph's mantle, right sleeve                      | Dark yellow, shading   | PLM, ESEM-EDX, FTIR-ATR               |
|                 |                                                                                          | SF6         | Virgin's mantle                                       | Dark blue, shading     | PLM, ESEM-EDX, FTIR-ATR               |
|                 |                                                                                          | SF7         | Back of the panel, support                            | Wood                   | PLM; ESEM                             |
|                 |                                                                                          | SF8         | Protective layers                                     | Reddish                | PLM; ESEM-EDX                         |
|                 |                                                                                          | SF9         | Junction between the boards                           | Canvas                 | PLM, ESEM-EDX                         |
|                 | <i>Tobias and the Archangel Raphael</i> , c.1490-1494; Urbino, Casa Raffaello            | GSS1        | Tobias' robe                                          | Green, shading         | PLM, ESEM-EDX, FTIR, FTIR-ATR         |
|                 |                                                                                          | GSS2        | Raphael's mantle                                      | Yellow, shading        | PLM, ESEM-EDX, FTIR                   |
|                 |                                                                                          | GSS3        | Raphael's cuff                                        | Red                    | PLM, ESEM-EDX, FTIR-ATR               |
|                 |                                                                                          | GSS4        | Raphael's robe                                        | Violet-blue            | PLM, ESEM-EDX, FTIR-ATR               |
|                 |                                                                                          | GSS5        | Original support, right side                          | Canvas                 | PLM, ESEM-EDX                         |
|                 |                                                                                          | GSS7        | Sky, horizon, right side                              | White repainting       | GC-MS                                 |
|                 |                                                                                          | GSS8        | Sky, below the white cloud                            | Light blue repainting  | GC-MS                                 |
| Justus of Ghent | <i>Communion of the Apostles</i> , c.1473-1474*; Urbino, Galleria Nazionale delle Marche | CA2         | Red mantle of the kneeling apostle                    | Red                    | PLM, ESEM-EDX, FTIR-ATR*              |
|                 |                                                                                          | CA7         | Blue/violet Christ's robe                             | Blue/violet            | PLM, ESEM-EDX, FTIR-ATR*              |

\*[3,4,10]

**Table S2.** *Martyrdom of Saint Sebastian* – Integrated stratigraphic analyses

| Sample code                                                                                       | Layer | Maximum thickness (µm) | Typology          | Stratigraphic identification (PLM+ESEM-EDX+ µRAMAN)     | FTIR and FTIR-ATR                                                                                                                                         |
|---------------------------------------------------------------------------------------------------|-------|------------------------|-------------------|---------------------------------------------------------|-----------------------------------------------------------------------------------------------------------------------------------------------------------|
| <b>GSM1</b><br>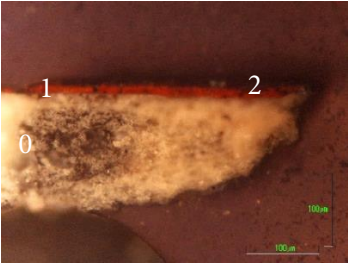  | 2     | 8 µm                   | Red glaze layer   | Red lake, vermilion, powdered glass                     | Partially hydrolysed esters of carboxylic acids (oil), carboxylates, Ca-oxalates, lead white, gypsum, Ca/Mg carbonate                                     |
|                                                                                                   | 1     | 8 µm                   | Red layer         | Vermilion, lead white, red lake Fe-based pigments       |                                                                                                                                                           |
|                                                                                                   | 0     | 100 µm                 | Ground layer      | Calcium sulphate                                        | Gypsum, anhydrite, partially hydrolysed esters of carboxylic acids (oil and wax), carboxylates, calcium oxalates, proteinaceous material, Ca/Mg carbonate |
|                                                                                                   |       | 180 µm                 |                   | Calcium sulphate, silicates                             |                                                                                                                                                           |
| <b>GSM2</b><br>  | 2     | 16 µm                  | Red glaze layer   | Red lake                                                | Lead white, partially hydrolysed esters of carboxylic acids (oil), carboxylates, proteinaceous materials                                                  |
|                                                                                                   | 1     | 46 µm                  | Pink layer        | Vermilion, lead white, red lake, silicate particles     |                                                                                                                                                           |
|                                                                                                   | 0     | 140 µm                 | Ground layer      | Calcium sulphate, silicates                             | Gypsum, anhydrite, proteinaceous material, partially hydrolysed esters of carboxylic acids (wax and oil), carboxylates, Ca-oxalates, Ca/Mg carbonate      |
| <b>GSM3</b><br> | 2     | 40 µm                  | Green glaze layer | Cu-based pigments, silicates, chlorides                 | Verdigris basic (Cu-acetate basic), partially hydrolysed esters of carboxylic acids (oil), Ca-oxalates                                                    |
|                                                                                                   | 1     | 80 µm                  | Green layer       | Cu-based pigments, silicates, lead-tin yellow, hematite | Verdigris basic, partially hydrolysed esters of carboxylic acids (oil), Ca-oxalates                                                                       |
|                                                                                                   | 0     | 240 µm                 | Ground layer      |                                                         | Gypsum, esters of carboxylic acids (oil), proteinaceous material                                                                                          |

|                                                                                                   |   |                |                   |                                                                                                     |                                                                                                                                                         |
|---------------------------------------------------------------------------------------------------|---|----------------|-------------------|-----------------------------------------------------------------------------------------------------|---------------------------------------------------------------------------------------------------------------------------------------------------------|
| <b>GSM4</b><br>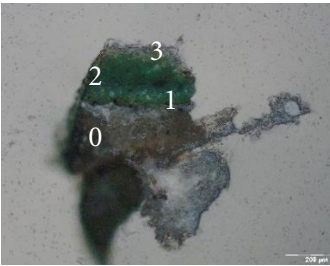  | 3 | 10 µm          | Green glaze layer | Cu-based pigments, lead white                                                                       | Verdigris basic, partially hydrolysed esters of carboxylic acids (wax and oil), Ca-oxalates, gypsum, anhydrite                                          |
|                                                                                                   | 2 | 50 µm          | Green layer       | Cu-based pigments, lead-tin yellow, orpiment, dolomite                                              |                                                                                                                                                         |
|                                                                                                   | 1 | 44 µm          | Green layer       | Cu-based pigments, lead-tin yellow type I, cerussite, hydrocerussite, dolomite particles, chlorides | Proteinaceous materials, esters of carboxylic acids (mainly wax), gypsum, anhydrite, Ca-oxalates, verdigris basic                                       |
|                                                                                                   | 0 | 140 µm         | Ground layer      | Calcium sulphate, Fe-based pigments                                                                 | Gypsum, anhydrite, wax, calcium oxalates                                                                                                                |
| <b>GSM5</b><br>  | 1 | 50 µm          | Blue layer        | Lead white, azurite with Ag impurities, silicates, silica particles, calcite                        | Azurite, lead white, partially hydrolysed esters of carboxylic acids and proteinaceous material (egg), Ca-oxalates, gypsum                              |
|                                                                                                   | 0 | 40 µm<br>60 µm | Ground layer      | Calcium sulphate, silica particles                                                                  | Gypsum, anhydrite, partially hydrolysed esters of carboxylic acids (wax and oil), carboxylates, calcium oxalates, proteinaceous material                |
| <b>GSM6</b><br> | 3 | 50 µm          | Red layer         | Red lake, powdered glass particles, vermilion, lead white                                           | Silicate compounds, hydrated alumina, gypsum, calcium carbonate, proteinaceous materials, partially hydrolysed esters of carboxylic acids, carboxylates |
|                                                                                                   | 2 | 80 µm          | Flesh layer       | Lead white vermilion, lead-tin yellow, silicates                                                    | Lead white, partially hydrolysed esters of carboxylic acids (oil), carboxylates, natural resin                                                          |
|                                                                                                   | 1 | 10 µm          | Priming layer     |                                                                                                     | Lead white, hydrocerussite, partially hydrolysed esters of carboxylic acids (oil and wax), carboxylates, C-oxalates, proteinaceous material, gypsum     |
|                                                                                                   | 0 | 80 µm          | Ground layer      | Calcium sulphate                                                                                    | Gypsum, anhydrite                                                                                                                                       |

|                                                                                                      |   |        |              |                                                                      |                                                                                                                                                                    |
|------------------------------------------------------------------------------------------------------|---|--------|--------------|----------------------------------------------------------------------|--------------------------------------------------------------------------------------------------------------------------------------------------------------------|
| <b>GSM7</b><br>     | 1 | 50 µm  | Violet layer | Azurite, red lake, lead white                                        | Azurite, partially hydrolysed esters of carboxylic acids and proteinaceous material (egg)                                                                          |
|                                                                                                      | 0 | 55 µm  | Ground layer | Calcium sulphate, rare Cu-based pigments, quartz particles           | Gypsum, anhydrite, esters of carboxylic acids (wax and oil), Ca/Mg carbonate                                                                                       |
| <b>GSM8</b><br>     | 1 | 55 µm  | Brown layer  | Fe-based pigments (ochre), vermilion, lead white, Cu-based particles | Lead white, almost totally hydrolysed esters of carboxylic acids (oil), carboxylates, gypsum, silicates                                                            |
|                                                                                                      | 0 | 400µm  | Ground layer | Calcium sulphate, silicates                                          | Gypsum, anhydrite, esters of carboxylic acids (oil), Ca/Mg carbonate                                                                                               |
| <b>GSM 10</b><br>  | 1 | 55 µm  | Blue layer   | Azurite, lead white, dolomite particles                              | Azurite, esters of carboxylic acids and proteinaceous material (egg)                                                                                               |
|                                                                                                      | 0 | 450 µm | Ground layer | Calcium sulphate                                                     | Gypsum, anhydrite, partially hydrolysed esters of carboxylic acids (wax and oil), carboxylates, ca-oxalates, proteinaceous material, Ca-carbonate, Ca/Mg carbonate |
| <b>GSM 11</b><br> | 1 | 10 µm  | Brown layer  |                                                                      | Lead white, partially hydrolysed esters of carboxylic acids (oil), carboxylates, gypsum, Ca/Mg carbonate                                                           |
|                                                                                                      | 0 | 110 µm | Ground layer | Calcium sulphate, quartz particles                                   | Gypsum, anhydrite, esters of carboxylic acids (wax and oil), silicates                                                                                             |

**Table S3.** *Visitation* – Integrated stratigraphic analyses of samples

| Sample code                                                                                      | Layer | Maximum thickness (µm) | Typology             | Stratigraphic identification (PLM+ESEM-EDX+µRAMAN)                                                | FTIR and FTIR-ATR                                                                   |
|--------------------------------------------------------------------------------------------------|-------|------------------------|----------------------|---------------------------------------------------------------------------------------------------|-------------------------------------------------------------------------------------|
| <b>SF1</b><br>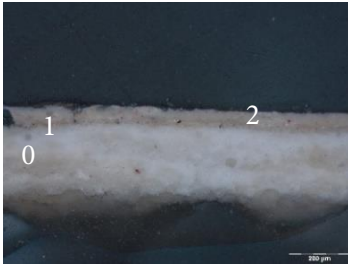  | 2     | 60 µm                  | Pinkish layer        | Lead white, vermilion, dolomite particles, colourless powdered glass, Fe-based pigments, red lake | Lead white, partially hydrolysed esters of carboxylic acids, carboxylates           |
|                                                                                                  |       |                        | Underdrawing         | Carbon black                                                                                      |                                                                                     |
|                                                                                                  | 1     | 5 µm                   | Priming layer        | Lead white, Fe-based pigments (ochre)                                                             | Gypsum                                                                              |
|                                                                                                  | 0     | 150 µm                 | Ground layer         | Calcium sulphate, silica particles                                                                | Gypsum, proteinaceous material                                                      |
| <b>SF2</b><br>  | 3     | 20 µm                  | Green glaze layer    | Cu-based pigments, lead-tin yellow                                                                | Verdigris basic, esters of carboxylic acids, Ca-oxalates                            |
|                                                                                                  | 2     | 20 µm                  | Green layer          | Cu-based pigments, lead-tin yellow                                                                |                                                                                     |
|                                                                                                  | 1     | 25 µm                  | Pale green layer     | Lead-tin yellow, Cu-based pigments, hematite, calcite, silica particles                           | Verdigris basic, lead white, esters of carboxylic acids                             |
|                                                                                                  | 0     | 60 µm                  | Ground layer         | Calcium sulphate, silica particles, lead white, Cu impurities                                     | Gypsum                                                                              |
| <b>SF3</b><br> | 2     | 15 µm                  | Dark red glaze layer | Red lake, vermilion, colourless powdered glass, bone black                                        | Calcium carbonate, esters of carboxylic acids, proteinaceous materials, Ca-oxalates |
|                                                                                                  | 1     | 60 µm                  | Red layer            | Vermillion, lead white, colourless powdered glass                                                 | Lead white, esters of carboxylic acids, proteinaceous material, Ca-oxalates         |

|                                                                                                   |   |        |                   |                                                                   |                                                                                  |
|---------------------------------------------------------------------------------------------------|---|--------|-------------------|-------------------------------------------------------------------|----------------------------------------------------------------------------------|
| <b>SF4</b><br>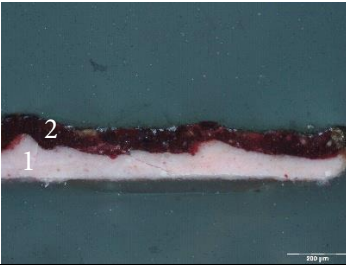   | 2 | 85 µm  | Red glaze layer   | Red lake, lead-tin yellow, vermillion, colourless glass particles | Lead white, esters of carboxylic acids, proteinaceous material, hydrated alumina |
|                                                                                                   | 1 | 180 µm | Pink layer        | Lead white, red lake, colourless glass particles                  | Lead white, partially hydrolysed esters of carboxylic acids, carboxylates        |
| <b>SF5</b><br>   | 3 | 8 µm   | Brown glaze layer | Fe-based pigments (ochre)                                         |                                                                                  |
|                                                                                                   | 2 | 60 µm  | Yellow layer      | Lead-tin yellow, Fe-based pigments                                | Silicates, esters of carboxylic acids, calcium carbonate                         |
|                                                                                                   | 1 | 60 µm  | Green layer       | Cu-based pigments, lead-tin yellow                                | Verdigris basic, carboxylates                                                    |
|                                                                                                   | 0 | 120 µm | Ground layer      | Calcium sulphate                                                  | Anhydrite, proteinaceous material                                                |
| <b>SF6</b><br>  | 2 |        | Blue layer        | Azurite, silica particles, hematite                               | Azurite, esters of carboxylic acids, proteinaceous material, silicates           |
|                                                                                                   | 1 | 5 µm   | Priming layer     | Lead white, orpiment, Fe-based pigments                           |                                                                                  |
|                                                                                                   | 0 | 180 µm | Ground layer      | Calcium sulphate, silica particles, lead white particles?         | Gypsum, calcium carbonate, esters of carboxylic acids, proteinaceous material    |
| <b>SF8</b><br> | 2 | 70 µm  | Brownish layer    |                                                                   | Partially hydrolysed esters of carboxylic acids, carboxylates                    |
|                                                                                                   | 1 | 50 µm  | Red layer         | Pb-based red, calcium carbonate, silicates                        | Silicates, proteinaceous materials                                               |
|                                                                                                   | 0 | 200 µm | Ground layer      | Calcium sulphate, silicates                                       | Gypsum, proteinaceous material                                                   |
|                                                                                                   |   |        | Adhesive layer    |                                                                   | Silicates, proteinaceous material, esters of carboxylic acids                    |
|                                                                                                   |   |        | Support           |                                                                   | Cellulosic material, Ca-oxalates                                                 |



**Table S4.** *Tobias and the Archangel Raphael* – Integrated stratigraphic analyses

| Sample                                                                                           | Layer | Maximum thickness (µm) | Typology          | Stratigraphic identification (PLM+ESEM-EDX)                               | FTIR and FTIR-ATR                                                                                                     |
|--------------------------------------------------------------------------------------------------|-------|------------------------|-------------------|---------------------------------------------------------------------------|-----------------------------------------------------------------------------------------------------------------------|
| <b>GSS1</b><br> | 3     | 30 µm                  | Green glaze layer | Cu-based pigments, chlorides, orpiment                                    | Verdigris basic, esters of carboxylic acids, silicates                                                                |
|                                                                                                  | 2     | 60 µm                  | Green layer       | Cu-based pigments, lead-tin yellow, Fe-based pigments                     |                                                                                                                       |
|                                                                                                  | 1     | 50 µm                  | Light green layer | Cu-based pigments, lead white, lead-tin yellow, orpiment, glass particles | Verdigris basic, partially hydrolysed esters of carboxylic acids, barium sulphate                                     |
|                                                                                                  | 0     | 55                     | Ground layer      | Calcium sulphate, silica impurities                                       | Partially hydrolysed esters of carboxylic acids, carboxylates, Ca-oxalates, gypsum, silicates, proteinaceous material |
| <b>GSS2</b><br> | 2     | 15 µm                  | Yellowish glaze   | Earth pigments, bone black                                                |                                                                                                                       |
|                                                                                                  | 1     | 83 µm                  | Yellow layer      | Lead-tin yellow, hematite                                                 | Hydrolysed ester of carboxylic acids, carboxylates, Ca-oxalates, Ca-carbonate, silicates                              |
|                                                                                                  | 0     | 150 µm                 | Ground layer      | Calcium sulphate                                                          | Hydrolysed ester of carboxylic acids, carboxylates, Ca-oxalates, gypsum                                               |

|                                                                                                  |   |        |                 |                                                |                                                                                                                             |
|--------------------------------------------------------------------------------------------------|---|--------|-----------------|------------------------------------------------|-----------------------------------------------------------------------------------------------------------------------------|
| <b>GSS3</b><br>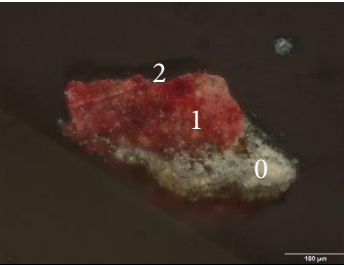 | 2 | 15 µm  | Red glaze layer | Red lake, powdered glass particles             |                                                                                                                             |
|                                                                                                  | 1 | 150 µm | Red layer       | Red lake, lead white, powdered glass particles | Lead white, silicates and hydrated alumina, almost totally hydrolysed esters of carboxylic acids, carboxylates, Ca-oxalates |
|                                                                                                  | 0 | 110 µm | Ground layer    | Calcium sulphate, aluminosilicates             |                                                                                                                             |
| <b>GSS4</b><br> | 2 | 45 µm  | Violet layer    | Lead white, natural ultramarine, red lake      | Lead white, esters of carboxylic acids, proteinaceous material, silicates, Ca-oxalates                                      |
|                                                                                                  | 1 | 5 µm   | Red layer       | Red lake,                                      | Calcium carbonate, silicates, proteinaceous material, Ca-oxalates                                                           |
|                                                                                                  | 0 | 110 µm | Ground layer    | Calcium sulphate, silica                       |                                                                                                                             |



**Table S5** Relative percentage of the integrated areas respect the analytes detected by GC-MS analysis for the lipidic fraction.

| Sample | CC9   | C14:0 | C16:0 | C18:0 | A/P  | P/S  |
|--------|-------|-------|-------|-------|------|------|
| SF1    | 32,65 | 0,33  | 41,02 | 26,00 | 0,80 | 1,58 |
| SF2    | 30,83 | 0,51  | 42,93 | 25,64 | 0,72 | 1,67 |
| SF4    | 31,36 | 0,69  | 41,69 | 26,26 | 0,75 | 1,59 |
| GSS7   | 22,30 | 9,36  | 42,70 | 25,64 | 0,52 | 1,67 |
| GSS8   | 23,94 | 8,00  | 43,06 | 25,00 | 0,56 | 1,72 |
| GSM12  | 26,74 | 2,4   | 44,43 | 26,43 | 0,60 | 1,68 |
| GSM13  | 26,95 | 3,41  | 44,34 | 25,30 | 0,61 | 1,75 |

\*The following labels are used: azelaic acid (CC9); miristic acid (C14:0; palmitic acid (C16:0); stearic acid (C18:0).  
A/P refers to the ratio between azelaic and palmitic acids; P/S refers to the ratio between palmitic and stearic acids.
